# Supplementary material for: Dysregulation of the TOX-RUNX3 pathway in cutaneous T-cell lymphoma
Source: Oncotarget. 2019 May 3;10(33):3104–13. doi: 10.18632/oncotarget.5742 (PMC6517103; doi:10.18632/oncotarget.5742)
Supplement: Supplementary file 1 [file oncotarget-10-3104-s001.pdf]

**SUPPLEMENTARY TABLE**

| Patient | Age/Sex/ Race | Diagnosis, Stage        |
|---------|---------------|-------------------------|
| 1       | 58 WM         | T3N1M0B2/Stage IVA1, SS |
| 2       | 80 WF         | T3N0M0B2/Stage IVA1, SS |
| 3       | 42 AAF        | T3N1M0B2/Stage IVA1, SS |
| 4       | 67 WF         | T3N0M0B2/Stage IVA1, SS |
| 5       | 67 WM         | T3N0M0B2/Stage IVA1, SS |

Patient characteristics for the five SS patient samples that were used to determine gene expression levels with qRT-PCR analysis.
